# Supplementary material for: No evidence for increased prevalence of colorectal carcinoma in 399 Dutch patients with Birt-Hogg-Dubé syndrome
Source: PubMed Central journal article supplement (PMC7028712; doi:10.1038/s41416-019-0693-1), 2019-12-20
Supplement: 41416_2019_693_MOESM1_ESM.pdf [file 41416_2019_693_MOESM1_ESM.pdf]

## Supplementary Information

**Figure S1:** dot plots of age (A) and diameter (B) of the first CRC

**Figure S2:** dot plots of the number of polyps per person (A) and age at first polyp (B)

**Table S1:** CRC and polyps in the FLCN<sup>MUT</sup> group

**Table S2:** CRC and polyps in the FLCN<sup>WT</sup> group

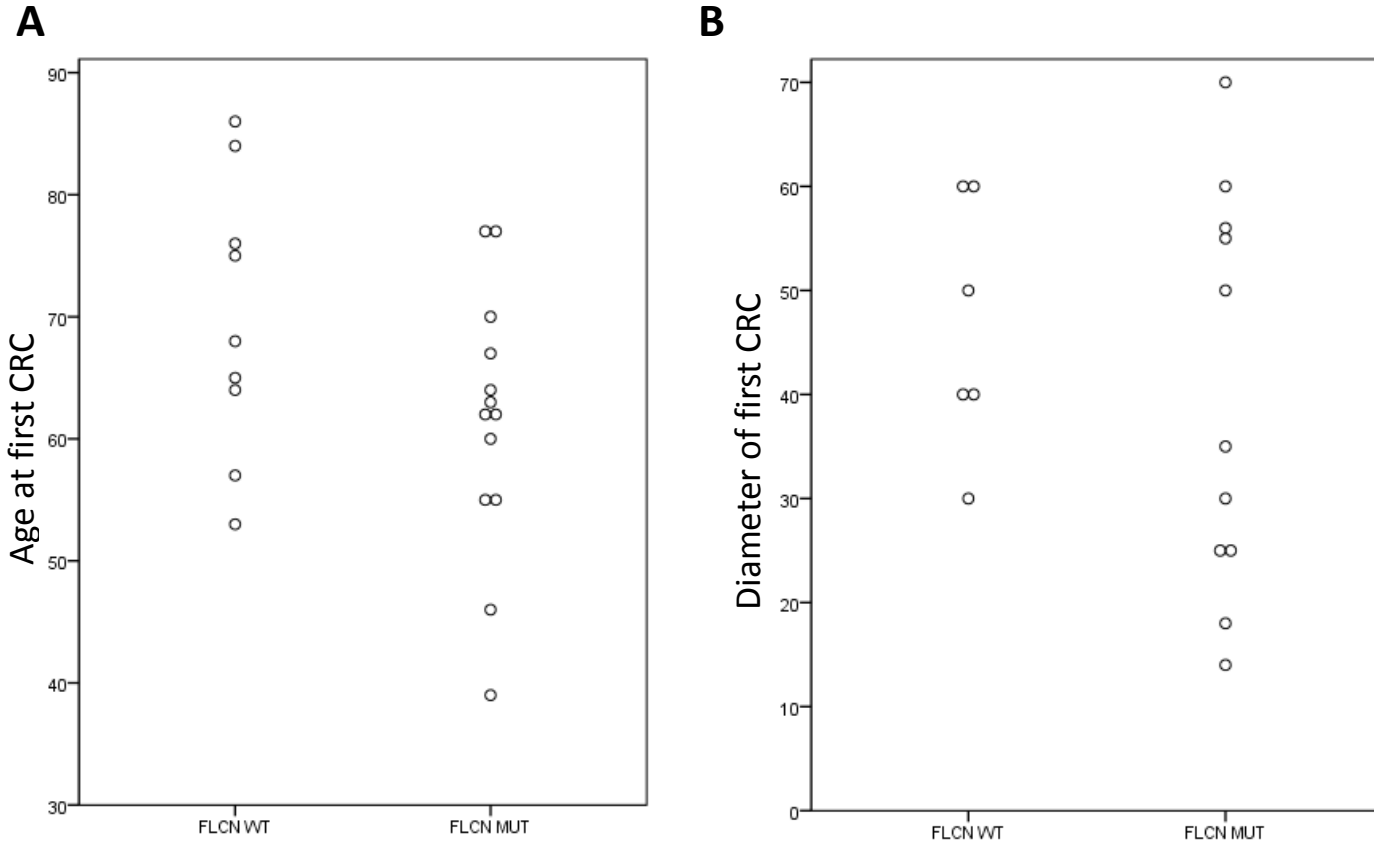

Figure S1: dot plots of age (A) and diameter (B) of the first CRC

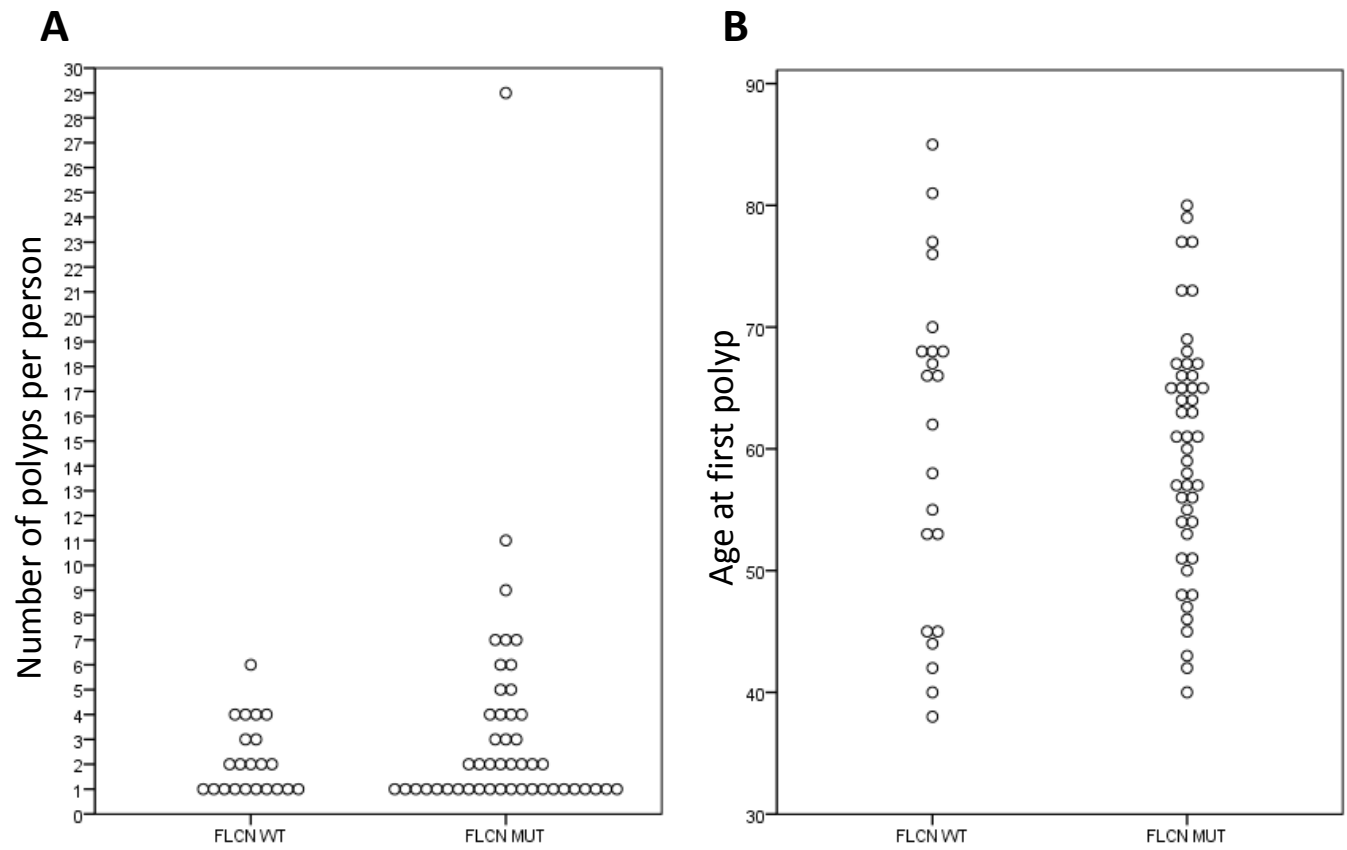

Figure S2: dot plots of the number of polyps per person (A) and age at first polyp (B)

**Table S1: CRC and polyps in the FLCN<sup>MUT</sup> group**

| General |                       | CRC     |     |          |                 |          | Polyps    |           |              |   |   |                        |   |   |   |               |    |   |   |
|---------|-----------------------|---------|-----|----------|-----------------|----------|-----------|-----------|--------------|---|---|------------------------|---|---|---|---------------|----|---|---|
| Number  | poly (C) <sub>8</sub> | CRC (n) | Age | Location | Differentiation | Diameter | Polyp (n) | Age first | Location (n) |   |   | Grade of dysplasia (n) |   |   |   | Histology (n) |    |   |   |
|         |                       |         |     |          |                 |          |           |           | D            | P | U | N/M                    | M | S | U | A             | SS | H | U |
| 1       | N                     | Y (1)   | 62  | D        | M               | 18       | N         |           |              |   |   |                        |   |   |   |               |    |   |   |
| 2       | N                     | N       |     |          |                 |          | Y (1)     | 65        | 1            |   |   | 1                      |   |   |   | 1             |    |   |   |
| 3       | N                     | Y (1)   | 46  |          | M               | 70       | Y (7)     | 50        | 1            | 4 | 2 | 4                      |   | 1 | 2 | 5             |    | 2 |   |
| 4       | N                     | N       |     |          |                 |          | Y (3)     | 43        | 1            |   | 2 | 2                      |   |   | 1 | 2             |    | 1 |   |
| 5       | N                     | N       |     |          |                 |          | Y (2)     | 80        | 1            |   | 1 |                        |   |   | 2 | 1             |    | 1 |   |
| 6       | N                     | N       |     |          |                 |          | Y (1)     | 65        | 1            |   |   | 1                      |   |   |   | 1             |    |   |   |
| 7       | N                     | Y (1)   | 64  | P        | M               | 60       | Y (2)     | 60        | 1            |   | 1 |                        |   |   | 2 |               |    | 2 |   |
| 8       | N                     | N       |     |          |                 |          | Y (1)     | 53        |              | 1 |   | 1                      |   |   |   | 1             |    |   |   |
| 9       | N                     | N       |     |          |                 |          | Y (3)     | 57        | 1            | 2 |   | 3                      |   |   |   | 2             |    | 1 |   |
| 10      | N                     | N       |     |          |                 |          | Y (5)     | 67        | 4            | 1 |   | 3                      |   | 1 | 1 | 4             |    | 1 |   |
| 11      | N                     | N       |     |          |                 |          | Y (1)     | 48        | 1            |   |   |                        |   |   | 1 |               |    | 1 |   |
| 12      | N                     | N       |     |          |                 |          | Y (6)     | 64        | 2            | 4 |   | 3                      |   |   | 3 | 3             |    | 3 |   |
| 13      | N                     | Y (1)   | 77  | P        | W/M             | 30       | Y (1)     | 77        |              |   | 1 | 1                      |   |   |   | 1             |    |   |   |
| 14      | N                     | Y (1)   | 39  | D        | M               | 35       | N         |           |              |   |   |                        |   |   |   |               |    |   |   |
| 15      | Y                     | N       |     |          |                 |          | Y (1)     | 42        |              |   | 1 |                        | 1 |   |   | 1             |    |   |   |
| 16      | N                     | Y (1)   | 55  | D        | M               | 56       | Y (1)     | 66        |              |   | 1 | 1                      |   |   |   |               |    | 1 |   |
| 17      | N                     | N       |     |          |                 |          | Y (2)     | 57        | 2            |   |   |                        |   |   | 2 |               |    | 2 |   |
| 18      | N                     | Y (1)   | 62  | D        | M               | 50       | Y (11)    | 57        | 2            | 3 | 6 | 3                      |   |   | 8 | 3             |    | 8 |   |
| 19      | N                     | N       |     |          |                 |          | Y (1)     | 56        |              |   | 1 | 1                      |   |   |   | 1             |    |   |   |
| 20      | N                     | N       |     |          |                 |          | Y (6)     | 46        | 1            | 1 | 4 | 1                      | 2 |   | 3 | 3             |    | 3 |   |
| 21      | N                     | N       |     |          |                 |          | Y (9)     | 64        | 5            | 4 |   | 7                      |   |   | 2 | 6             | 1  | 2 |   |
| 22      | N                     | N       |     |          |                 |          | Y (1)     | 68        | 1            |   |   |                        |   | 1 |   | 1             |    |   |   |
| 23      | N                     | N       |     |          |                 |          | Y (1)     | 65        |              |   | 1 | 1                      |   |   |   |               |    | 1 |   |
| 24      | N                     | N       |     |          |                 |          | Y (2)     | 79        |              | 1 | 1 | 2                      |   |   |   | 2             |    |   |   |
| 25      | N                     | N       |     |          |                 |          | Y (4)     | 61        | 2            | 1 | 1 | 1                      | 1 | 2 | 2 | 2             |    | 2 |   |
| 26      | N                     | N       |     |          |                 |          | Y (1)     | 54        |              | 1 |   | 1                      |   |   |   | 1             |    |   |   |
| 27      | N                     | Y (1)   | 60  | D        | M               | 14       | N         |           |              |   |   |                        |   |   |   |               |    |   |   |
| 28      | N                     | N       |     |          |                 |          | Y (1)     | 58        | 1            |   |   |                        |   |   | 1 |               |    | 1 |   |
| 29      | N                     | N       |     |          |                 |          | Y (1)     | 65        |              | 1 |   | 1                      |   |   |   | 1             |    |   |   |
| 30      | N                     | N       |     |          |                 |          | Y (2)     | 51        |              | 1 | 1 | 1                      |   | 1 | 2 |               |    |   |   |

|    |   |       |           |          |         |         |        |    |   |   |    |    |   |   |    |    |   |    |   |
|----|---|-------|-----------|----------|---------|---------|--------|----|---|---|----|----|---|---|----|----|---|----|---|
| 31 | N | N     |           |          |         |         | Y (5)  | 73 | 1 | 3 | 1  | 5  |   |   |    | 5  |   |    |   |
| 32 | N | Y (1) | 77        |          | W/M     | 55      | Y (4)  | 77 | 1 |   | 3  | 3  |   |   | 1  | 3  |   | 1  |   |
| 33 | N | N     |           |          |         |         | Y (7)  | 61 |   |   | 7  | 6  |   |   | 1  | 5  | 1 | 1  |   |
| 34 | Y | N     |           |          |         |         | Y (2)  | 47 |   | 2 |    | 2  |   |   |    | 2  |   |    |   |
| 35 | N | N     |           |          |         |         | Y (2)  | 69 | 2 |   |    | 2  |   |   |    | 2  |   |    |   |
| 36 | N | N     |           |          |         |         | Y (7)  | 54 | 4 | 2 | 1  | 2  |   | 1 | 4  | 3  |   | 4  |   |
| 37 | N | N     |           |          |         |         | Y (1)  | 66 |   | 1 |    | 1  |   |   |    | 1  |   |    |   |
| 38 | N | N     |           |          |         |         | Y (1)  | 61 |   |   | 1  | 1  |   |   |    |    |   |    | 1 |
| 39 | N | N     |           |          |         |         | Y (3)  | 67 |   |   | 3  | 2  | 1 |   |    | 3  |   |    |   |
| 40 | N | N     |           |          |         |         | Y (1)  | 45 |   | 1 |    | 1  |   |   |    | 1  |   |    |   |
| 41 | N | Y (1) | 55        | D        | M       |         | Y (1)  | 63 | 1 |   |    | 1  |   |   |    | 1  |   |    |   |
| 42 | N | N     |           |          |         |         | Y (1)  | 51 | 1 |   |    | 1  |   |   |    | 1  |   |    |   |
| 43 | N | N     |           |          |         |         | Y (2)  | 48 | 1 | 1 |    | 1  |   |   | 1  | 1  |   | 1  |   |
| 44 | N | N     |           |          |         |         | Y (1)  | 40 | 1 |   |    |    | 1 |   |    | 1  |   |    |   |
| 45 | N | Y (1) | 67        | D        |         |         | Y (4)  | 67 | 2 | 1 | 1  | 3  |   |   | 1  | 3  |   | 1  |   |
| 46 | N | N     |           |          |         |         | Y (4)  | 55 | 1 | 1 | 2  |    |   |   | 4  | 3  |   | 1  |   |
| 47 | N | N     |           |          |         |         | Y (1)  | 73 | 1 |   |    |    |   |   | 1  |    |   | 1  |   |
| 48 | N | N     |           |          |         |         | Y (1)  | 56 |   | 1 |    |    |   |   | 1  |    | 1 |    |   |
| 49 | N | Y (2) | 63 (both) | P (both) | W/M + U | 25 & 10 | Y (29) | 63 |   | 1 | 28 | 13 |   |   | 16 | 13 | 1 | 15 |   |
| 50 | N | Y (1) | 70        | D        | W/M     | 25      | N      |    |   |   |    |    |   |   |    |    |   |    |   |
| 51 | N | N     |           |          |         |         | Y (1)  | 59 |   |   | 1  | 1  |   |   |    | 1  |   |    |   |

N, no; Y, yes; U, unknown. Location: D, distal; P, proximal. Differentiation: M, moderate; W/M, well/moderate; P, poor. Grade of dysplasia: N/M, no/mild; M, moderate; S, severe. Histology: A, adenoma; SS, sessile serrated adenoma; H, hyperplastic polyp.

**Table S2: CRC and polyps in the FLCN<sup>WT</sup> group**

| General | CRC    |         |     |          |                 | Polyps   |           |           |              |   |   |                        |   |   |   |               |    |   |
|---------|--------|---------|-----|----------|-----------------|----------|-----------|-----------|--------------|---|---|------------------------|---|---|---|---------------|----|---|
|         | Number | CRC (n) | Age | Location | Differentiation | Diameter | Polyp (n) | Age first | Location (n) |   |   | Grade of dysplasia (n) |   |   |   | Histology (n) |    |   |
|         |        |         |     |          |                 |          |           |           | D            | P | U | N/M                    | M | S | U | A             | SS | H |
| 52      | N      |         |     |          |                 | Y(1)     | 45        | 1         |              |   |   |                        |   | 1 |   |               | 1  |   |
| 53      | N      |         |     |          |                 | Y(1)     | 81        | 1         |              |   |   |                        | 1 |   |   | 1             |    |   |
| 54      | Y(1)   | 76      | D   | W/M      | 40              | Y(4)     | 76        | 2         | 1            | 1 | 2 |                        |   | 2 | 1 | 1             | 2  |   |
| 55      | N      |         |     |          |                 | Y(4)     | 66        | 2         | 2            |   | 3 |                        |   | 1 | 1 | 2             | 1  |   |
| 56      | N      |         |     |          |                 | Y(2)     | 38        | 1         | 1            |   | 2 |                        |   |   | 2 |               |    |   |
| 57      | Y(1)   | 64      | D   | M        |                 | N        |           |           |              |   |   |                        |   |   |   |               |    |   |
| 58      | N      |         |     |          |                 | Y(2)     | 40        | 1         | 1            |   | 2 |                        |   |   | 1 |               | 1  |   |
| 59      | N      |         |     |          |                 | Y(1)     | 68        |           |              | 1 |   | 1                      |   |   | 1 |               |    |   |
| 60      | Y(1)   | 84      | D   | P        | 60              | Y(1)     | 85        |           | 1            |   |   |                        |   | 1 | 1 |               |    |   |
| 61      | N      |         |     |          |                 | Y(2)     | 53        | 1         |              | 1 | 1 |                        |   | 1 | 1 |               | 1  |   |
| 62      | N      |         |     |          |                 | Y(1)     | 67        | 1         |              |   | 1 |                        |   |   | 1 |               |    |   |
| 63      | Y(2)   | 53 & 65 | D   | M (both) | U & 30          | Y(3)     | 58        |           | 2            | 1 | 1 | 2                      |   |   | 3 |               |    |   |
| 64      | N      |         |     |          |                 | Y(1)     | 66        |           | 1            |   | 1 |                        |   |   | 1 |               |    |   |
| 65      | N      |         |     |          |                 | Y(1)     | 68        |           | 1            |   | 1 |                        |   |   | 1 |               |    |   |
| 66      | Y(1)   | 65      | P   | W/M      | U               | N        |           |           |              |   |   |                        |   |   |   |               |    |   |
| 67      | N      |         |     |          |                 | Y(1)     | 62        |           |              | 1 | 1 |                        |   |   | 1 |               |    |   |
| 68      | N      |         |     |          |                 | Y(4)     | 45        | 2         | 1            | 1 | 3 | 1                      |   |   | 4 |               |    |   |
| 69      | Y(1)   | 57      | P   | M        | 40              | N        |           |           |              |   |   |                        |   |   |   |               |    |   |
| 70      | Y(1)   | 86      | P   | M        | 50              | Y(6)     | 70        |           | 1            | 5 | 5 |                        |   | 1 | 5 |               | 1  |   |
| 71      | N      |         |     |          |                 | Y(1)     | 55        | 1         |              |   |   |                        |   | 1 |   |               | 1  |   |
| 72      | N      |         |     |          |                 | Y(4)     | 77        | 2         |              | 2 | 1 |                        | 1 | 2 | 2 |               | 2  |   |
| 73      | Y(1)   | 75      | P   |          | 30              | N        |           |           |              |   |   |                        |   |   |   |               |    |   |
| 74      | N      |         |     |          |                 | Y(2)     | 42        |           |              | 2 | 1 |                        |   | 1 | 1 |               | 1  |   |
| 75      | Y(1)   | 68      | D   | M        | 60              | Y(2)     | 68        | 1         |              | 1 | 1 |                        |   | 1 | 1 |               | 1  |   |
| 76      | N      |         |     |          |                 | Y(1)     | 44        | 1         |              |   |   |                        |   | 1 |   |               | 1  |   |
| 77      | N      |         |     |          |                 | Y(3)     | 53        |           |              | 3 | 2 |                        |   | 1 | 2 |               | 1  |   |

N, no; Y, yes; U, unknown. Location: D, distal; P, proximal. Differentiation: M, moderate; W/M, well/moderate; P, poor. Grade of dysplasia: N/M, no/mild; M, moderate; S, severe. Histology: A, adenoma; SS, sessile serrated adenoma; H, hyperplastic polyp.
